# Supplementary material for: The co-inhibitory receptor TIGIT regulates NK cell function and is upregulated in human intrahepatic CD56bright NK cells
Source: PubMed Central journal article supplement (PMC9948018; doi:10.3389/fimmu.2023.1117320), 2023-02-09
Supplement: DataSheet_1.pdf [file DataSheet_1.pdf]

## Supplementary Material

**A**

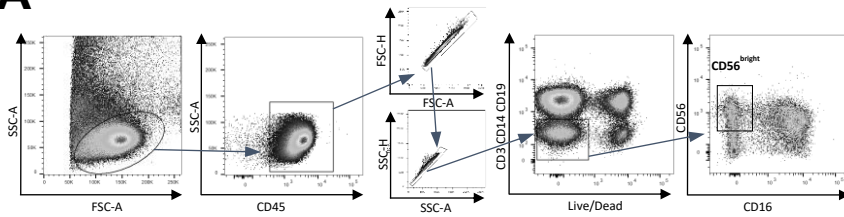

**B**

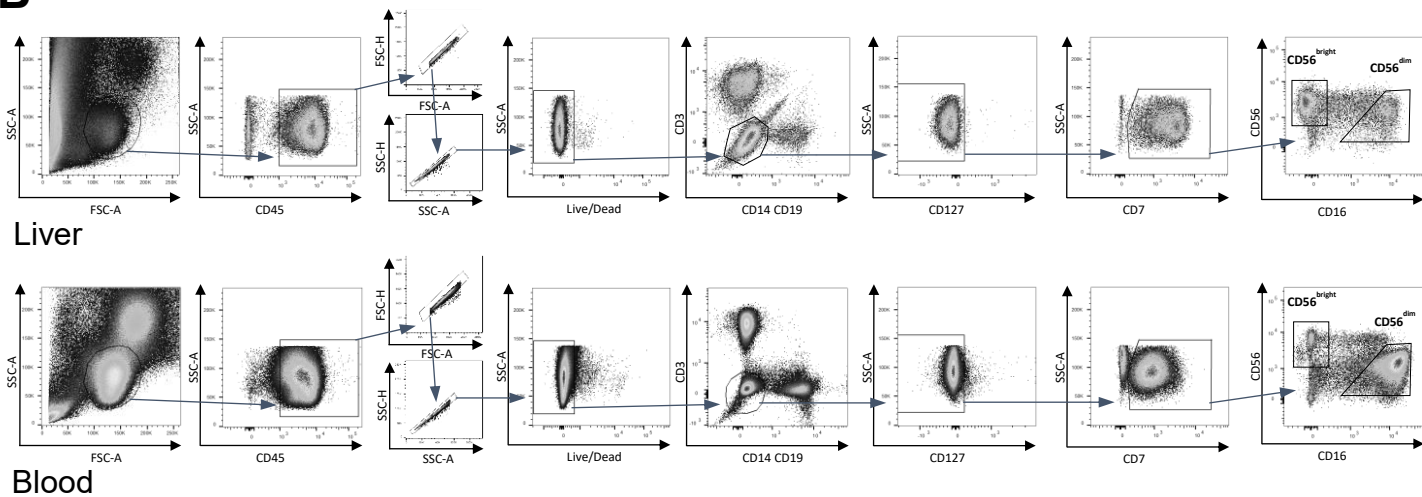

### Supplementary Figure S1: Gating strategy for the identification of NK cells for single-cell mRNA analysis (A) and for phenotypical analysis (B).

Representative plots for the identification of CD56<sup>bright</sup> NK cells from liver samples (A+B) and PBMCs (B). (A) NK cells for single-cell mRNA analysis were defined as CD45<sup>+</sup>CD3<sup>-</sup>CD14<sup>-</sup>CD19<sup>-</sup>CD16<sup>-</sup>CD56<sup>bright</sup> NK cells (B) NK cells for further phenotypical analysis were defined as CD3<sup>-</sup>CD14<sup>-</sup>CD19<sup>-</sup>CD127<sup>-</sup>CD7<sup>+</sup>CD16<sup>-</sup>CD56<sup>bright</sup> NK cells or CD3<sup>-</sup>CD14<sup>-</sup>CD19<sup>-</sup>CD127<sup>-</sup>CD7<sup>+</sup>CD16<sup>+</sup>CD56<sup>dim</sup> NK cells.

Initial gating on FSC-Area and SSC-Area. Lymphocytes were identified using CD45. Exclusion of doublets (FSC Width and SSC Width). Zombie NIR was used as a Live/Dead marker.

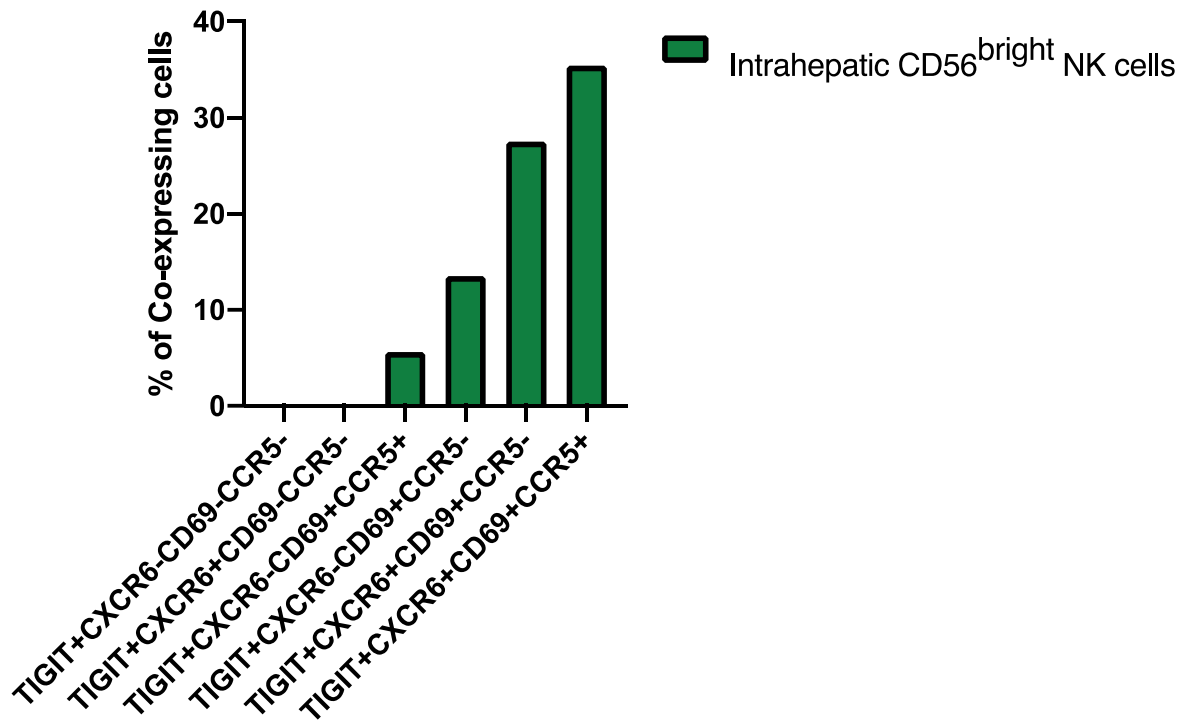

**Supplementary Figure S2: Co-expression analysis of *TIGIT* and markers for tissue-residency and/or tissue-homing in intrahepatic CD56<sup>bright</sup> NK cells.**

Graph displaying percentage of mRNA co-expression of *TIGIT* and markers for liver-residency and/or tissue-homing (*CXCR6*, *CD69*, *CCR5*) in intrahepatic CD56<sup>bright</sup> NK cells.

**Supplementary Table S1: Antibodies used for flow cytometry.**

| <i>Antibody/Reagent (Dilution)</i>                             | <i>Fluorochrome</i> | <i>Clone</i> | <i>Supplier</i>                  | <i>Cat#</i> |
|----------------------------------------------------------------|---------------------|--------------|----------------------------------|-------------|
| <b>anti-CD3 (1:100)</b>                                        | BV510               | UCHT1        | BioLegend, San Diego, CA, USA    | 300448      |
| <b>anti-CD3 (1:100)</b>                                        | FITC                | UCHT1        | BioLegend, San Diego, CA, USA    | 300406      |
| <b>anti-CD3 (1:100)</b>                                        | BUV395              | UCHT1        | BD Bioscience, San Jose, CA, USA | 563546      |
| <b>anti-CD7 (1:100)</b>                                        | BUV395              | M-T701       | BD Bioscience, San Jose, CA, USA | 563845      |
| <b>anti-CD14 (1:100)</b>                                       | AF700               | M5E2         | BioLegend, San Diego, CA, USA    | 325614      |
| <b>anti-CD14 (1:100)</b>                                       | BV510               | M5E2         | BioLegend, San Diego, CA, USA    | 301842      |
| <b>anti-CD16 (1:100)</b>                                       | APC-Cy7             | 3G8          | BioLegend, San Diego, CA, USA    | 302018      |
| <b>anti-CD16 (1:100)</b>                                       | BV785               | 3G8          | BioLegend, San Diego, CA, USA    | 302046      |
| <b>anti-CD16 (1:100)</b>                                       | BUV737              | 3G8          | BD Bioscience, San Jose, CA, USA | 564434      |
| <b>anti-CD16 (1:100)</b>                                       | PE/Cy7              | 3G8          | BioLegend, San Diego, CA, USA    | 302016      |
| <b>anti-CD19 (1:100)</b>                                       | AF700               | HIB19        | BioLegend, San Diego, CA, USA    | 302226      |
| <b>anti-CD19 (1:100)</b>                                       | BV510               | HIB19        | BioLegend, San Diego, CA, USA    | 302242      |
| <b>anti-CD45 (1:100)</b>                                       | BUV395              | HI30         | BD Bioscience, San Jose, CA, USA | 563792      |
| <b>anti-CD45 (1:100)</b>                                       | AF700               | 2D1          | BioLegend, San Diego, CA, USA    | 368514      |
| <b>anti-CD45 (1:100)</b>                                       | BV711               | HI30         | BD Bioscience, San Jose, CA, USA | 564357      |
| <b>anti-CD56 (1:100)</b>                                       | BUV395              | NCAM16.2     | BD Bioscience, San Jose, CA, USA | 563554      |
| <b>anti-CD56 (1:50)</b>                                        | BUV737              | NCAM16.2     | BD Bioscience, San Jose, CA, USA | 564447      |
| <b>anti-CD56 (1:50)</b>                                        | BV786               | NCAM16.2     | BD Bioscience, San Jose, CA, USA | 564058      |
| <b>anti-CD69 (1:100)</b>                                       | BV421               | FN50         | BioLegend, San Diego, CA, USA    | 310930      |
| <b>anti-CD69 (1:100)</b>                                       | BV605               | FN50         | BioLegend, San Diego, CA, USA    | 310938      |
| <b>anti-CD69 (1:100)</b>                                       | APC                 | FN50         | BioLegend, San Diego, CA, USA    | 310910      |
| <b>anti-CD96 (1:50)</b>                                        | BV421               | NK92.39      | BioLegend, San Diego, CA, USA    | 338418      |
| <b>anti-CXCR6 (1:100)</b>                                      | PE-Cy7              | K041E5       | BioLegend, San Diego, CA, USA    | 356012      |
| <b>anti-CXCR6 (1:100)</b>                                      | PerCP/Cy5.5         | K041E5       | BioLegend, San Diego, CA, USA    | 356010      |
| <b>anti-TNF<math>\alpha</math> (1:100)</b>                     | PE/Cy7              | MAb11        | BioLegend, San Diego, CA, USA    | 502930      |
| <b>anti-CD107a (1:50)</b>                                      | BV711               | H4A3         | BioLegend, San Diego, CA, USA    | 328640      |
| <b>anti-CD127 (1:100)</b>                                      | AF700               | A019D5       | BioLegend, San Diego, CA, USA    | 351344      |
| <b>anti-CD226 (DNAM-1) (1:50)</b>                              | BV605               | 11A8         | BioLegend, San Diego, CA, USA    | 338302      |
| <b>Anti-CYP3A4 (1:50)</b>                                      | PE                  |              | Biorbyt Ltd, Cambridge, UK       | Orb124579   |
| <b>Anti-PVR (1:50)</b>                                         | PE                  | SKII.4       | BioLegend, San Diego, CA, USA    | 337610      |
| <b>Anti-PVR (1:50)</b>                                         | PE-Cy7              | SKII.4       | BioLegend, San Diego, CA, USA    | 337614      |
| <b>anti-TIGIT (1:50)</b>                                       | PE                  | A15153G      | BioLegend, San Diego, CA, USA    | 372704      |
| <b>Mouse IgG1, <math>\kappa</math> isotype control (1:200)</b> | PE                  | MOPC-21      | BioLegend, San Diego, CA, USA    | 400112      |
| <b>Mouse IgG1, <math>\kappa</math> isotype control (1:200)</b> | PE-Cy7              | MOPC-21      | BioLegend, San Diego, CA, USA    | 400125      |
| <b>Zombie Aqua Fixable Viability Kit</b>                       |                     |              | BioLegend, San Diego, CA, USA    | 423102      |
| <b>Zombie NIR Fixable Viability Kit</b>                        |                     |              | BioLegend, San Diego, CA, USA    | 423105      |

**Supplementary Table S2: Primers used for single-cell mRNA analysis:**

| <i>Target</i>   | <i>Forward primer (5' to 3')</i> | <i>Reverse primer (5' to 3')</i> |
|-----------------|----------------------------------|----------------------------------|
| <b>AHR</b>      | TAGGCTCAGCGTCAGTTACC             | TGGCCTCCGTTTCTTTACGTA            |
| <b>B2M</b>      | TTAGCTGTGCTCGCGCTAC              | TTAGCTGTGCTCGCGCTAC              |
| <b>CCR5</b>     | TGAGACATCCGTTCCCTACA             | TGGCAGGGCTCCGATGTATA             |
| <b>CCR6</b>     | AGGCAGCGATGTCTGTGAA              | AGCTCAAGCCCAACATCA               |
| <b>CD38</b>     | ACCTCACATGGTGTGGTGAA             | GTTGCTGCAGTCCTTTCTCC             |
| <b>CD69</b>     | TCACCATGGAAGTGGTCAA              | ACACACTTGTGACACCCTGTA            |
| <b>CXCR3</b>    | AACTGTGGCCGAGAAAGCA              | TTGAGGCAGCAGTGCATGTA             |
| <b>CXCR5</b>    | ATCTTCTTCTCTGCTGGTCA             | GGTATTGTCCACGGCCTTCA             |
| <b>CXCR6</b>    | TCTCTGGAACAACTGGCAAA             | CTGGCTGCTGTCATTGAAAC             |
| <b>EOMES</b>    | CTGTGGCAAAGCCGACAATA             | CTCATCCAGTGGGAACCAGTA            |
| <b>FCER1G</b>   | CAGCAGTGGTCTTGCTCTTAC            | GGAGGGTGAGGACAATTCCATA           |
| <b>FCGR3A</b>   | CATTCTTTCCACCTGGGTACCA           | AGTCTGTGTCCACTGCAAA              |
| <b>GAPDH</b>    | GAACGGGAAGCTTGTGCATCAA           | ATCGCCCCACTTGATTTTGG             |
| <b>GZMK</b>     | ATCCACAGTGGGTGCTGAC              | AGAGTGTGCGCCTAAAACCA             |
| <b>HLA-DRA</b>  | CGCTCAGGAATCATGGGCTA             | CGCTGATTGGTCAGGATTCA             |
| <b>IFNG</b>     | ACTGCCAGGACCCATATGTAA            | GTTCCATTATCCGCTACATCTGAA         |
| <b>IL18</b>     | ACCAAGGAAATCGGCCTCTA             | ACCTCTAGGCTGGCTATCTTTA           |
| <b>IL18R1</b>   | GGGAGGCACAGACACCAAAA             | TGAAGACGTGGCCTGGGATA             |
| <b>IL22</b>     | TATCACCAACCGCACCTTCA             | GTTTCTCCCAATGAGACGAAC            |
| <b>IL2RB</b>    | CACCGCCCCATGTCTCA                | CAGGGGCCGCCATTACA                |
| <b>IL7R</b>     | GGAGAAAGTGGCTATGCTCAA            | CTGCGATCCATTCACTTCCA             |
| <b>IRF1</b>     | AACAAGGATGCCTGTTTGTTC            | TGGGATCTGGCTCCTTTTCC             |
| <b>IRF8</b>     | GGAGTCAGTCCTTCCAGAC              | CGCGTCGTAGGTGGTGTGA              |
| <b>ITGA1</b>    | CGGTGGAAGACATGTTTGGATA           | GCCAACTAACGGAGAACCAA             |
| <b>ITGAM</b>    | GCCGGTGAAATATGCTGTCTAC           | GGTATTCTCTGAGGCCGTGAA            |
| <b>KLRB1</b>    | GGACATTCAACAGAGCAGGAA            | CTCGGAGTTGCTGCCAATATA            |
| <b>KLRC3</b>    | CAGGCCTGTGCTTCAAAGAA             | CACCAATCCATGAGGAAGGTAA           |
| <b>NCAM1</b>    | ATGCGACCATCCACCTCAAA             | GTGACCTGCTCCTCTAATTCCA           |
| <b>NCR1</b>     | AACCATGCCTGGTCTTTCCC             | TGCAAGGCTGGTGTCTCAA              |
| <b>PDK1</b>     | ACCAAGACCTCGTGTGAGAC             | AAGACGTGATATGGGCAATCCA           |
| <b>PRF1</b>     | GTACAGCTTCAGCACTGACAC            | CTGGGTGGAGGCGTTGAA               |
| <b>PTPRC</b>    | GTGGCTTAAACTCTTGGCATT            | GGGAAGGTGTTGGGCTTT               |
| <b>RORA</b>     | CAGCAGATAACGTGGCAGAC             | GGCACACAATTGCCACATCA             |
| <b>RPL13A</b>   | GAGGCCCTACCACTTCC                | GCCGTCAAACACTTGAGAC              |
| <b>RUNX3</b>    | AGCACCACAAGCCACTTCA              | TCGGAGAATGGGTTCAGTTCC            |
| <b>SIPR1</b>    | TCATCGTCCGGCATTACAAC             | ACACCACCGAGGTCAGTTTA             |
| <b>SIPR5</b>    | CGCCTTCATCGTCTAGAGAA             | GGAACATGGGAGCGTGAA               |
| <b>SERPINB1</b> | TGCCGGATGACATTGAGGAC             | AGTCCACTCATGCAACTTTTCCA          |
| <b>SMAD4</b>    | CACCAAAACGGCCATCTTCA             | GGAATGCAAGCTCATTGTGAAC           |
| <b>SMAD7</b>    | CTTCATCAAGTCCGCCACAC             | TTGATGGAGAAACCGGGGAA             |
| <b>STAT1</b>    | ATGCTGGCACCAGAACGAA              | GCTGGCACAATTGGGTTTCAA            |
| <b>STAT3</b>    | AGCATCGAGCAGCTGACTAC             | CCATGTGATCTGACACCCTGAA           |
| <b>STAT4</b>    | GCAAGACGAATTTGACTACAGGTA         | TCCTGATTCACCATGGCACTA            |
| <b>STAT5A</b>   | CCCAGGCTCCCTATAACATGTA           | ATGGTCTCATCCAGGTGCGAA            |
| <b>STAT6</b>    | TGCTCTGGTCGAGTCA                 | TCCAGGACACCATCAAACCA             |
| <b>TBX21</b>    | GGGCGTCCAACAATGTGAC              | CCGTCGTTACCTCAACGATA             |
| <b>TGFBRI</b>   | ACAGAAGTTAAGGCCAAATATCCC         | GCTCCATTGGCATAACCAACA            |

|                |                       |                       |
|----------------|-----------------------|-----------------------|
| <b>TGFBR2</b>  | TTCCCAGCTTCTGGCTCAAC  | GGTCCCAGCACTCAGTCAAC  |
| <b>TIGIT</b>   | GTGGTGGTCGCGTTGACTA   | TCCTGTCCAGCTGATTTCTCC |
| <b>TNFSF10</b> | AGAAGGAAGGGCTTCAGTGAC | CCTGGACCTCCATCATAGCC  |
| <b>ZBTB16</b>  | AGCCACACGGCTCTCAA     | AGCTGCCACAGAACTCACA   |
| <b>ZEB2</b>    | AGCCAATGGGCAAGAAGAA   | AGGTCAGCAGTTGGGCAAA   |

**Supplementary Table S3:** Differentially expressed genes comparing patient derived ihCD56<sup>bright</sup> NK cells (*liver*), patient derived pbCD56<sup>bright</sup> NK cells (*blood*) and healthy control pbCD56<sup>bright</sup> NK cells (*blood control*).

| Differentially expressed genes | Groups                  |             |     |
|--------------------------------|-------------------------|-------------|-----|
| <i>CCR5</i>                    | Ref group (liver)       | .           |     |
|                                | Group 2 (blood)         | p<0.0001    | *** |
|                                | Group 3 (blood control) | p<0.0001    | *** |
| <i>CCR6</i>                    | Ref group (liver)       | .           |     |
|                                | Group 2 (blood)         | 0.996001    |     |
|                                | Group 3 (blood control) | p<0.05      | *   |
| <i>CD38</i>                    | Ref group (liver)       | .           |     |
|                                | Group 2 (blood)         | p<0.0001    | *** |
|                                | Group 3 (blood control) | 0.000052642 | *** |
| <i>CD69</i>                    | Ref group (liver)       | .           |     |
|                                | Group 2 (blood)         | p<0.0001    | *** |
|                                | Group 3 (blood control) | p<0.0001    | *** |
| <i>CXCR3</i>                   | Ref group (liver)       | .           |     |
|                                | Group 2 (blood)         | p<0.0001    | *** |
|                                | Group 3 (blood control) | p<0.0001    | *** |
| <i>CXCR6</i>                   | Ref group (liver)       | .           |     |
|                                | Group 2 (blood)         | p<0.0001    | *** |
|                                | Group 3 (blood control) | p<0.0001    | *** |
| <i>EOMES</i>                   | Ref group (liver)       | .           |     |
|                                | Group 2 (blood)         | p<0.0001    | *** |
|                                | Group 3 (blood control) | p<0.0001    | *** |
| <i>FCER1G</i>                  | Ref group (liver)       | .           |     |
|                                | Group 2 (blood)         | p<0.0001    | *** |
|                                | Group 3 (blood control) | p<0.0001    | *** |
| <i>FCGR3A</i>                  | Ref group (liver)       | .           |     |
|                                | Group 2 (blood)         | p<0.05      | *   |
|                                | Group 3 (blood control) | 0.143934    |     |
| <i>IFNG</i>                    | Ref group (liver)       | .           |     |
|                                | Group 2 (blood)         | p<0.0001    | *** |
|                                | Group 3 (blood control) | p<0.0001    | *** |
| <i>IL18</i>                    | Ref group (liver)       | .           |     |
|                                | Group 2 (blood)         | p<0.0001    | *** |
|                                | Group 3 (blood control) | 0.657329    |     |
| <i>IL18R1</i>                  | Ref group (liver)       | .           |     |
|                                | Group 2 (blood)         | p<0.0001    | *** |
|                                | Group 3 (blood control) | 0.148225    |     |
| <i>IL22</i>                    | Ref group (liver)       | .           |     |
|                                | Group 2 (blood)         | p<0.0001    | *** |
|                                | Group 3 (blood control) | p<0.001     | **  |
| <i>IL2RB</i>                   | Ref group (liver)       | .           |     |
|                                | Group 2 (blood)         | p<0.0001    | *** |
|                                | Group 3 (blood control) | p<0.05      | *   |

|                |                         |           |     |
|----------------|-------------------------|-----------|-----|
| <i>IL7R</i>    | Ref group (liver)       | .         |     |
|                | Group 2 (blood)         | p<0.0001  | *** |
|                | Group 3 (blood control) | 0.0560555 |     |
| <i>IRF1</i>    | Ref group (liver)       | .         |     |
|                | Group 2 (blood)         | p<0.05    | *   |
|                | Group 3 (blood control) | 0.474638  |     |
| <i>IRF8</i>    | Ref group (liver)       | .         |     |
|                | Group 2 (blood)         | p<0.0001  | *** |
|                | Group 3 (blood control) | p<0.0001  | *** |
| <i>ITGA1</i>   | Ref group (liver)       | .         |     |
|                | Group 2 (blood)         | p<0.05    | *   |
|                | Group 3 (blood control) | 0.20705   |     |
| <i>ITGAM</i>   | Ref group (liver)       | .         |     |
|                | Group 2 (blood)         | p<0.0001  | *** |
|                | Group 3 (blood control) | p<0.05    | *   |
| <i>KLRB1</i>   | Ref group (liver)       | .         |     |
|                | Group 2 (blood)         | p<0.0001  | *** |
|                | Group 3 (blood control) | p<0.0001  | *** |
| <i>KLRC3</i>   | Ref group (liver)       | .         |     |
|                | Group 2 (blood)         | 0         | *** |
|                | Group 3 (blood control) | 0.959982  |     |
| <i>NCAM1</i>   | Ref group (liver)       | .         |     |
|                | Group 2 (blood)         | p<0.0001  | *** |
|                | Group 3 (blood control) | 0.971472  |     |
| <i>NCR1</i>    | Ref group (liver)       | .         |     |
|                | Group 2 (blood)         | p<0.001   | **  |
|                | Group 3 (blood control) | p<0.0001  | *** |
| <i>PRF1</i>    | Ref group (liver)       | .         |     |
|                | Group 2 (blood)         | p<0.0001  | *** |
|                | Group 3 (blood control) | 0.648428  |     |
| <i>PTPRC</i>   | Ref group (liver)       | .         |     |
|                | Group 2 (blood)         | p<0.001   | **  |
|                | Group 3 (blood control) | p<0.05    | *   |
| <i>RORA</i>    | Ref group (liver)       | .         |     |
|                | Group 2 (blood)         | p<0.0001  | *** |
|                | Group 3 (blood control) | p<0.0001  | *** |
| <i>RUNX3</i>   | Ref group (liver)       | .         |     |
|                | Group 2 (blood)         | p<0.0001  | *** |
|                | Group 3 (blood control) | 0.640389  |     |
| <i>SIPR1</i>   | Ref group (liver)       | .         |     |
|                | Group 2 (blood)         | p<0.0001  | *** |
|                | Group 3 (blood control) | p<0.001   | **  |
| <i>SIPR5</i>   | Ref group (liver)       | .         |     |
|                | Group 2 (blood)         | p<0.0001  | *** |
|                | Group 3 (blood control) | p<0.0001  | *** |
| <i>SERPIN1</i> | Ref group (liver)       | .         |     |
|                | Group 2 (blood)         | p<0.0001  | *** |
|                | Group 3 (blood control) | p<0.05    | *   |

|                |                         |           |     |
|----------------|-------------------------|-----------|-----|
| <i>STAT1</i>   | Ref group (liver)       | .         |     |
|                | Group 2 (blood)         | p<0.0001  | *** |
|                | Group 3 (blood control) | 0.878365  |     |
| <i>STAT3</i>   | Ref group (liver)       | .         |     |
|                | Group 2 (blood)         | 0.227315  |     |
|                | Group 3 (blood control) | p<0.05    | *   |
| <i>STAT4</i>   | Ref group (liver)       | .         |     |
|                | Group 2 (blood)         | p<0.0001  | *** |
|                | Group 3 (blood control) | p<0.0001  | *** |
| <i>STAT6</i>   | Ref group (liver)       | .         |     |
|                | Group 2 (blood)         | 0.89722   |     |
|                | Group 3 (blood control) | p<0.05    | *   |
| <i>TBX21</i>   | Ref group (liver)       | .         |     |
|                | Group 2 (blood)         | p<0.001   | **  |
|                | Group 3 (blood control) | 0.0931068 |     |
| <i>TGFBR2</i>  | Ref group (liver)       | .         |     |
|                | Group 2 (blood)         | p<0.0001  | *** |
|                | Group 3 (blood control) | p<0.0001  | *** |
| <i>TIGIT</i>   | Ref group (liver)       | .         |     |
|                | Group 2 (blood)         | p<0.0001  | *** |
|                | Group 3 (blood control) | p<0.0001  | *** |
| <i>TNFSF10</i> | Ref group (liver)       | .         |     |
|                | Group 2 (blood)         | p<0.05    | *   |
|                | Group 3 (blood control) | p<0.001   | **  |
| <i>ZBTB16</i>  | Ref group (liver)       | .         |     |
|                | Group 2 (blood)         | p<0.0001  | *** |
|                | Group 3 (blood control) | p<0.0001  | *** |
